# Supplementary material
Source: PubMed Central journal article supplement (PMC3874784)

### **Figure legends for Supplemental data**

#### **Figure S1. Cx43, integrin $\alpha 5$ and 14-3-3 $\theta$ are mostly not colocalized with TGN38.**

MLO-Y4 cells were subjected to FFSS (FF) (16 dynes/cm<sup>2</sup>) or non-FFSS (C) for 2 hr. Cells were fixed and dual-immunostained with antibodies against Cx43 and TGN38 (**A**),  $\alpha 5$  and TGN38 (**B**) or 14-3-3 $\theta$  and  $\alpha 5$  (**C**). The overlaps were shown in merged image (merged).

Fig. S1

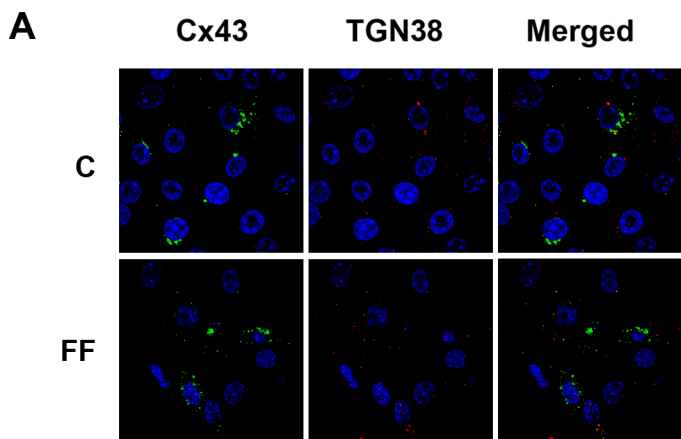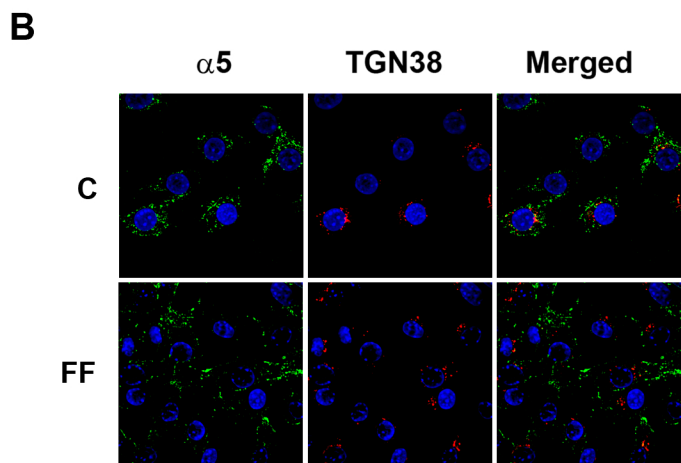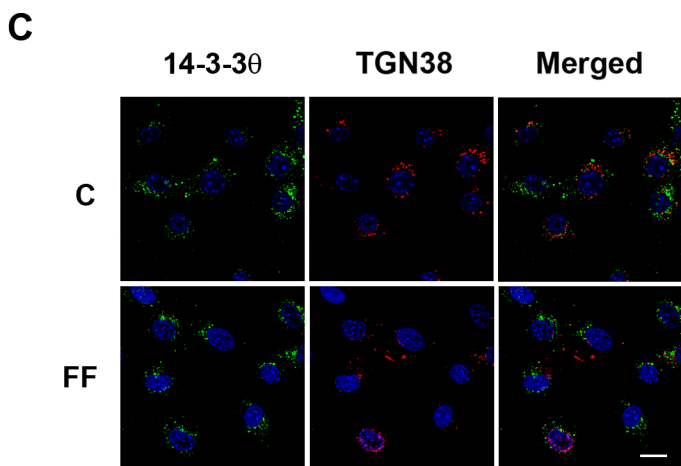

Supplement: supp_127.1.137_JCS133553.pdf [file supp_127.1.137_JCS133553.pdf]
